# Supplementary material for: Alterations of gut fungal microbiota in patients with rheumatoid arthritis
Source: PeerJ. 2022 Mar 1;10:e13037. doi: 10.7717/peerj.13037 (PMC8896017; doi:10.7717/peerj.13037)
Supplement: Supplemental Information 1 [file peerj-10-13037-s001.xlsx]

## Sheet: RA
No.	Sex	Age	RF	CRP	IgG	IgA	IgM	IgE	CEA	CA199	CA125	ESR		No.	Sex	Age	RF	CRP	IgG	IgA	IgM	IgE	CEA	CA199	CA125	ESR
1	Male	61	481	15.9	1130	413	124	302	1.29	4.85		66		201	Female	61	20	4.44	1380	469	122	79.6		5.83	4.33	27
2	Female	66		11.4	1460	103	25	16.9	0.83	11.5	4.96	35		202	Male	66	20	1.39	887	117	31	5	3.77	31.43		3
3	Female	68		21.5	1080	100	72	15.3	2.54	11.67	18.23	22		203	Female	49	20	1.08	1120	171	157	10.7	8.67	21.41	16.4	9
4	Female	79	506	23.4	1310	158	83	23.4	1.6	45.14	50.56	52		204	Female	60	20	2.82	1650	261	230	5	3.69	20.02	10.26	20
5	Female	60	148	8.75	1160	327	101	58.1	2.04	10.08	34.95	36		205	Male	66	20	1.89	1130	187	96	71.3	2.31	6.87		10
6	Female	62	271	2.1	1220	267	98	12.7	1.28	17.02	9.65	11		206	Male	63	20	1.4	804	167	47	18	5.61	28.79		2
7	Female	56	630	3.5	1540	355	94	29.9	1.1	6.27	11.55	30		207	Female	57	20	13.9	1390	345	84		2.33	19.93	15.25	20
8	Female	80			1020	331	136	41.8	5.51	23.32	19.84			208	Male	57	20	1	1510	243	102	5	2.73	16.17		2
10	Male	66	2330	5.91	1370	501	143	47.4	2	10.85		40		209	Female	68	20	2.7	1100	198	308	75.4	1.57	8.9	8.57	13
11	Male	66	39.3	13.5	1640	220	69	14.5				32		210	Female	50	20	1.59	1550	208	119	17.1
12	Male	70		5.12	1120		60	412	3.13	7.94		25		211	Male	80	24.1	59.8	1310	250	152	65.7	1.58	22.03		32
13	Male	76	240	12	1420	450	92		2.79	3.93		59		212	Male	67	20	1.89	1290	140	104	5	3.18	18.11		4
14	Female	49	140	4.23	1550	407	94	9.2	2.64	0.6	14.05	32		213	Female	32	20	1.34	1450	218	180	132	0.91	2.45	10.02	18
15	Male	55	28.7	10.7	1520	396	76	66.5	1.69	6.19		50		214	Female	44	20	1.6	1730	654	169	51.8				20
17	Female	63			1310	297	163	39.1	5.1	87.67				215	Male	54	20	1.11					7.09	8.14		2
18	Female	46	73	14.6	1640	427	158	16.2	1.92	10.67	9.04	48		216	Female	61		1.39	1280	69	159	6.4	2.88	24.99	7.25	3
19	Female	57	137	3.6	1320	269	103	5	3.25	8.59	15.56	11		217	Female	52	20	1.21	1180	212	101	40.8	1.42	5.19	9.13	2
20	Female	64	42.1	78.2	1280	223	127	20.2	2.01	24.85	10.78	18		218	Female	54	20	7.05	1020	271	38	11.4	0.71	6.71	10.31	11
21	Female	68	36.1	3.07	1570	368	52	143	6.74	16.62	43.48	60		219	Male	68	20	1.42	862	144	86	20.9	1.75	12.66		15
23	Female	70	469	9.56	1580	170	103	63.4	1.37	13.71	25.31	50		220	Male	54	20	1.11	974	129	90	22.5	1.16	4.3		5
24	Female	64		3.21	986	327	35	62.5	1.52	23.95	13.08	23		221	Female	50	20	1.08	1560	170	78	40	0.64	9.85	10.82	8
26	Female	66	416	17.4	814	131	110	56.8	1.19	3.99	6.99	32		222	Female	56	20	1.36	1940	181	215	40.9	2.22	24.34	8.83	11
27	Female	63	77	1.97	1220	331	84	102				4		223	Female	53	20	2.26	1260	240	50	27.9	1.36	8.94	9.34	5
28	Female	49		22.5	1350	279	197		1.43	4.9	11.44	26		224	Female	63	20	1	1220	155	50	111	1.71	7.04	4.29	2
29	Female	61	55.6	1.85	1400	382	153	25.8	1.65	7.11	10.44	39		225	Female	71	20	1	1410	193	127	186	3.08	35.18	7.62	12
30	Female	38	326	2.42	2010	648	227	229	1.19	13.1	11	76		226	Female	62	20	2.1	1580	158	140	35.5	1.36	16.11	6.63	3
32	Female	62	53.3	24.7	2370	415	124	114	2.27	17.72	11.89	92		227	Female	49	20	1	1760	269	341	24.8	2.85	30.13	17	16
33	Female	69	43.4	17.4	1330	236	76	142	3.21	9.67	10.12	41		228	Female	66	20	10.2	4050	246	79	121	1.19	27.72	19.31	41
35	Female	55	140	10.4								22		229	Female	69	20	3.21	1200	321	68	61.4	1.06	8.01	13.87	11
36	Male	65		15.3	1300	370	115	83.1	2.53	8.14		37		230	Female	62	20	7.42	1160	127	77	23	2.69	6.04	8.12	8
38	Female	63	459	12.8	1460	269	187	105	1.73	11.38	5.89	41		231	Female	65	20	2.07	1290	203	60	16.5	2.09	8.74	12.02	25
39	Male	56	262	32.8	1430	397	74	272	2.18	8.23		46		232	Female	62	25.1	4.48	1390	317	147	121	1.47	14.06	5.54	22
40	Female	68		5.63	1460	193	48	22.3	2.08	6.54	6.43	21		233	Female	78	32.3	4.43	1500	344	217	58.1	2.16	15.02	8.02	24
41	Female	60		21.6	2110	397	118	11	0.73	8.49	12.31	64		234	Female	64	20	2.39	1080	157	127		1.76	8.97	8.12	10
43	Female	74	908	48.2	2290	481	143	9	1.59	6.86	27.81	105		235	Female	64	20	2.2	1280	316	83	25.9	2.62	5.89	6.45	8
44	Male	65	306		1330	274	107	556	2.76	8.26		44		236	Female	72							0.99	12.02	17.74	18
46	Female	56	336	2.45	1400	432	127	9.4	1.38	1.06	11.95	36		237	Female	62	20	2.98	1160	281	122	45.2	1.4	8.04	9.07	12
47	Female	77	80.9	10.6	821		29	5	2.46	19.17	11.38	21		238	Female	62		3.29	1780	320	955	126	1.77	26.49	15.73	39
48	Male	57	28.2	5.56	1830	168	61	34.2	1.56	8.89		12		239	Female	64	20	76.4	1360	267	147	11.9				75
51	Female	79		17.1	1010	166	76	13	3.85	0.99	96.4	55
52	Female	77		34	1680	358	64	148	3.62	4.65	17.97	62			M	60.4359	20.5972	6.28947	1394.51	235.622	147.514	49.1343	2.39371	14.9033	10.3719	14.9474
53	Female	44	1130	1.62	1150	136	205	5	1.75	25.63	23.64	36			SD	9.17317	2.27577	15.1344	520.68	107.09	153.064	45.1943	1.71594	9.0687	4.16668	14.2468
	Female	33	61.3	3.96	1080	547	205	178				29			SEM	1.46888	0.364415	2.42344	83.3756	17.1482	24.5098	7.23688	0.27477	1.45215	0.667202	2.28131
	Male	36			1320	487	257	155	2.23	2.77
	Female	43	259	13	1440	386	176	7.2				66
	Male	46	349	9.25	1690	333	110	73.9	1.52	9.79		32
	Female	49	82.4	18.8				60	1.31	5.92	7.37	26
	Male	50	651	2.57	1080	222	97	10.6	1.67	9.31		24
	Female	52	34.2	1	1940	254	65	181	0.46	4.31	8.67	105
	Female	54	86.2	4.2				505	1.48	19.14	21.73	38
	Female	56	1250	4.07				51	2.88	41.99	15.32	12
	Female	57	1170	4.6	1680	222	149	139	1.21	8.83	13.83	34
	Female	59	147	2.06	1480	157	92	6.4	1.97	7.24	13.48	33
	Female	59	221	1.79	1370	243	109	75.4	0.64	5.96	14.04	11
	Male	60	1540	44	2110	440	197	193	1.38	12.13		66
	Female	60	170	3.01	1040	214	95	73	1.59	16.25	14.51	24
	Female	63	383	17.2	1970	423	162	98.8	2.51	14.34	10.51	18
	Female	63	133		629	152	59	62.4	3.99	22.05	27.04	76
	Female	64	198	8.1	1310	171	105	78.4	1.7	12.67	16.64	24
	Female	69	410	10.9	1170	137	82	163	3.7	26.79	21.87	29
	Male	71	281	6.39	2180	663	98		1.94	21.31	20.65	31
	Female	74	165	3.5	1250	380	170	35.9	2.52	4	10.61	17
	p		1.73562e-05	0.0388069	0.738429	0.00319782	0.116647	0.0305153	0.480017	0.561044	0.0151632	5.04284e-08
	M	60.7742	362.933	12.543	1426.38	314.339	113.121	94.6328	2.17912	13.4211	17.976	39.1017
	SD	10.4919	449.542	13.6288	366.149	131.9	50.8355	117.128	1.18442	13.4176	15.4719	22.3658
	SEM	1.33247	57.092	1.73086	46.501	16.7514	6.45612	14.8753	0.150421	1.70404	1.96493	2.84047

## Sheet: Con
No.	Sex	Age	RF	CRP	IgG	IgA	IgM	IgE	CEA	CA199	CA125	ESR
201	Female	61	20	4.44	1380	469	122	79.6		5.83	4.33	27
202	Male	66	20	1.39	887	117	31	5	3.77	31.43		3
203	Female	49	20	1.08	1120	171	157	10.7	8.67	21.41	16.4	9
204	Female	60	20	2.82	1650	261	230	5	3.69	20.02	10.26	20
205	Male	66	20	1.89	1130	187	96	71.3	2.31	6.87		10
206	Male	63	20	1.4	804	167	47	18	5.61	28.79		2
207	Female	57	20	13.9	1390	345	84	363	2.33	19.93	15.25	20
208	Male	57	20	1	1510	243	102	5	2.73	16.17		2
209	Female	68	20	2.7	1100	198	308	75.4	1.57	8.9	8.57	13
210	Female	50	20	1.59	1550	208	119	17.1
211	Male	80	24.1	59.8	1310	250	152	65.7	1.58	22.03		32
212	Male	67	20	1.89	1290	140	104	5	3.18	18.11		4
213	Female	32	20	1.34	1450	218	180	132	0.91	2.45	10.02	18
214	Female	44	20	1.6	1730	654	169	51.8				20
215	Male	54	20	1.11					7.09	8.14		2
216	Female	61		1.39	1280	69	159	6.4	2.88	24.99	7.25	3
217	Female	52	20	1.21	1180	212	101	40.8	1.42	5.19	9.13	2
218	Female	54	20	7.05	1020	271	38	11.4	0.71	6.71	10.31	11
219	Male	68	20	1.42	862	144	86	20.9	1.75	12.66		15
220	Male	54	20	1.11	974	129	90	22.5	1.16	4.3		5
221	Female	50	20	1.08	1560	170	78	40	0.64	9.85	10.82	8
222	Female	56	20	1.36	1940	181	215	40.9	2.22	24.34	8.83	11
223	Female	53	20	2.26	1260	240	50	27.9	1.36	8.94	9.34	5
224	Female	63	20	1	1220	155	50	111	1.71	7.04	4.29	2
225	Female	71	20	1	1410	193	127	186	3.08	35.18	7.62	12
226	Female	62	20	2.1	1580	158	140	35.5	1.36	16.11	6.63	3
227	Female	49	20	1	1760	269	341	24.8	2.85	30.13	17	16
228	Female	66	20	10.2	4050	246	79	121	1.19	27.72	19.31	41
229	Female	69	20	3.21	1200	321	68	61.4	1.06	8.01	13.87	11
230	Female	62	20	7.42	1160	127	77	23	2.69	6.04	8.12	8
231	Female	65	20	2.07	1290	203	60	16.5	2.09	8.74	12.02	25
232	Female	62	25.1	4.48	1390	317	147	121	1.47	14.06	5.54	22
233	Female	78	32.3	4.43	1500	344	217	58.1	2.16	15.02	8.02	24
234	Female	64	20	2.39	1080	157	127	974	1.76	8.97	8.12	10
235	Female	64	20	2.2	1280	316	83	25.9	2.62	5.89	6.45	8
236	Female	72							0.99	12.02	17.74	18
237	Female	62	20	2.98	1160	281	122	45.2	1.4	8.04	9.07	12
238	Female	62		3.29	1780	320	955	126	1.77	26.49	15.73	39
239	Female	64	20	76.4	1360	267	147	11.9				75

## Sheet: Less60
No.	Sex	Age	RF	CRP	IgG	IgA	IgM	IgE	CEA	CA199	CA125	ESR		No.	Sex	Age	RF	CRP	IgG	IgA	IgM	IgE	CEA	CA199	CA125	ESR
7	Female	56	630	3.5	1540	355	94	29.9	1.1	6.27	11.55	30		1	Male	61	481	15.9	1130	413	124	302	1.29	4.85		66
14	Female	49	140	4.23	1550	407	94	9.2	2.64	0.6	14.05	32		2	Female	66		11.4	1460	103	25	16.9	0.83	11.5	4.96	35
15	Male	55	28.7	10.7	1520	396	76	66.5	1.69	6.19		50		3	Female	68		21.5	1080	100	72	15.3	2.54	11.67	18.23	22
18	Female	46	73	14.6	1640	427	158	16.2	1.92	10.67	9.04	48		4	Female	79	506	23.4	1310	158	83	23.4	1.6	45.14	50.56	52
19	Female	57	137	3.6	1320	269	103	5	3.25	8.59	15.56	11		5	Female	60	148	8.75	1160	327	101	58.1	2.04	10.08	34.95	36
28	Female	49		22.5	1350	279	197		1.43	4.9	11.44	26		6	Female	62	271	2.1	1220	267	98	12.7	1.28	17.02	9.65	11
30	Female	38	326	2.42	2010	648	227	229	1.19	13.1	11	76		8	Female	80			1020	331	136	41.8	5.51	23.32	19.84
35	Female	55	140	10.4								22		10	Male	66	2330	5.91	1370	501	143	47.4	2	10.85		40
39	Male	56	262	32.8	1430	397	74	272	2.18	8.23		46		11	Male	66	39.3	13.5	1640	220	69	14.5				32
46	Female	56	336	2.45	1400	432	127	9.4	1.38	1.06	11.95	36		12	Male	70		5.12	1120		60	412	3.13	7.94		25
48	Male	57	28.2	5.56	1830	168	61	34.2	1.56	8.89		12		13	Male	76	240	12	1420	450	92		2.79	3.93		59
53	Female	44	1130	1.62	1150	136	205	5	1.75	25.63	23.64	36		17	Female	63			1310	297	163	39.1	5.1	87.67
	Female	33	61.3	3.96	1080	547	205	178				29		20	Female	64	42.1	78.2	1280	223	127	20.2	2.01	24.85	10.78	18
	Male	36			1320	487	257	155	2.23	2.77				21	Female	68	36.1	3.07	1570	368	52	143	6.74	16.62	43.48	60
	Female	43	259	13	1440	386	176	7.2				66		23	Female	70	469	9.56	1580	170	103	63.4	1.37	13.71	25.31	50
	Male	46	349	9.25	1690	333	110	73.9	1.52	9.79		32		24	Female	64		3.21	986	327	35	62.5	1.52	23.95	13.08	23
	Female	49	82.4	18.8				60	1.31	5.92	7.37	26		26	Female	66	416	17.4	814	131	110	56.8	1.19	3.99	6.99	32
	Male	50	651	2.57	1080	222	97	10.6	1.67	9.31		24		27	Female	63	77	1.97	1220	331	84	102				4
	Female	52	34.2	1	1940	254	65	181	0.46	4.31	8.67	105		29	Female	61	55.6	1.85	1400	382	153	25.8	1.65	7.11	10.44	39
	Female	54	86.2	4.2				505	1.48	19.14	21.73	38		32	Female	62	53.3	24.7	2370	415	124	114	2.27	17.72	11.89	92
	Female	56	1250	4.07				51	2.88	41.99	15.32	12		33	Female	69	43.4	17.4	1330	236	76	142	3.21	9.67	10.12	41
	Female	57	1170	4.6	1680	222	149	139	1.21	8.83	13.83	34		36	Male	65		15.3	1300	370	115	83.1	2.53	8.14		37
	Female	59	147	2.06	1480	157	92	6.4	1.97	7.24	13.48	33		38	Female	63	459	12.8	1460	269	187	105	1.73	11.38	5.89	41
	Female	59	221	1.79	1370	243	109	75.4	0.64	5.96	14.04	11		40	Female	68		5.63	1460	193	48	22.3	2.08	6.54	6.43	21
														41	Female	60		21.6	2110	397	118	11	0.73	8.49	12.31	64
	p		0.780707	0.029802	0.333913	0.316367	0.0232359	0.93281	0.0155324	0.13956	0.168804	0.447343		43	Female	74	908	48.2	2290	481	143	9	1.59	6.86	27.81	105
	M	50.5	342.818	7.81217	1491	338.25	133.8	96.3136	1.68857	9.97095	13.5113	36.3043		44	Male	65	306		1330	274	107	556	2.76	8.26		44
	SD	7.41913	382.64	7.96815	256.698	135.075	58.934	121.437	0.68048	9.26671	4.44254	22.1307		47	Female	77	80.9	10.6	821		29	5	2.46	19.17	11.38	21
	SEM	1.51442	78.1057	1.62648	52.398	27.572	12.0298	24.7881	0.138902	1.89155	0.906825	4.51739		51	Female	79		17.1	1010	166	76	13	3.85	0.99	96.4	55
														52	Female	77		34	1680	358	64	148	3.62	4.65	17.97	62
															Male	60	1540	44	2110	440	197	193	1.38	12.13		66
															Female	60	170	3.01	1040	214	95	73	1.59	16.25	14.51	24
															Female	63	383	17.2	1970	423	162	98.8	2.51	14.34	10.51	18
															Female	63	133		629	152	59	62.4	3.99	22.05	27.04	76
															Female	64	198	8.1	1310	171	105	78.4	1.7	12.67	16.64	24
															Female	69	410	10.9	1170	137	82	163	3.7	26.79	21.87	29
															Male	71	281	6.39	2180	663	98		1.94	21.31	20.65	31
															Female	74	165	3.5	1250	380	170	35.9	2.52	4	10.61	17
															M	67.2632	379.322	15.7432	1392.37	301.056	102.237	93.6056	2.46528	15.4336	20.3679	40.8889
															SD	5.96242	504.191	15.7075	411.4	130.101	42.9509	116.152	1.32338	15.0888	18.5776	22.6423
															SEM	0.967233	81.7905	2.54809	66.738	21.1052	6.96756	18.8423	0.214681	2.44773	3.01369	3.67306

## Sheet: Over60
No.	Sex	Age	RF	CRP	IgG	IgA	IgM	IgE	CEA	CA199	CA125	ESR
1	Male	61	481	15.9	1130	413	124	302	1.29	4.85		66
2	Female	66		11.4	1460	103	25	16.9	0.83	11.5	4.96	35
3	Female	68		21.5	1080	100	72	15.3	2.54	11.67	18.23	22
4	Female	79	506	23.4	1310	158	83	23.4	1.6	45.14	50.56	52
5	Female	60	148	8.75	1160	327	101	58.1	2.04	10.08	34.95	36
6	Female	62	271	2.1	1220	267	98	12.7	1.28	17.02	9.65	11
8	Female	80			1020	331	136	41.8	5.51	23.32	19.84
10	Male	66	2330	5.91	1370	501	143	47.4	2	10.85		40
11	Male	66	39.3	13.5	1640	220	69	14.5				32
12	Male	70		5.12	1120	122	60	412	3.13	7.94		25
13	Male	76	240	12	1420	450	92		2.79	3.93		59
17	Female	63			1310	297	163	39.1	5.1	87.67
20	Female	64	42.1	78.2	1280	223	127	20.2	2.01	24.85	10.78	18
21	Female	68	36.1	3.07	1570	368	52	143	6.74	16.62	43.48	60
23	Female	70	469	9.56	1580	170	103	63.4	1.37	13.71	25.31	50
24	Female	64		3.21	986	327	35	62.5	1.52	23.95	13.08	23
26	Female	66	416	17.4	814	131	110	56.8	1.19	3.99	6.99	32
27	Female	63	77	1.97	1220	331	84	102				4
29	Female	61	55.6	1.85	1400	382	153	25.8	1.65	7.11	10.44	39
32	Female	62	53.3	24.7	2370	415	124	114	2.27	17.72	11.89	92
33	Female	69	43.4	17.4	1330	236	76	142	3.21	9.67	10.12	41
36	Male	65		15.3	1300	370	115	83.1	2.53	8.14		37
38	Female	63	459	12.8	1460	269	187	105	1.73	11.38	5.89	41
40	Female	68		5.63	1460	193	48	22.3	2.08	6.54	6.43	21
41	Female	60		21.6	2110	397	118	11	0.73	8.49	12.31	64
43	Female	74	908	48.2	2290	481	143	9	1.59	6.86	27.81	105
44	Male	65	306		1330	274	107	556	2.76	8.26		44
47	Female	77	80.9	10.6	821	27	29	5	2.46	19.17	11.38	21
51	Female	79		17.1	1010	166	76	13	3.85	0.99	96.4	55
52	Female	77		34	1680	358	64	148	3.62	4.65	17.97	62
	Male	60	1540	44	2110	440	197	193	1.38	12.13		66
	Female	60	170	3.01	1040	214	95	73	1.59	16.25	14.51	24
	Female	63	383	17.2	1970	423	162	98.8	2.51	14.34	10.51	18
	Female	63	133		629	152	59	62.4	3.99	22.05	27.04	76
	Female	64	198	8.1	1310	171	105	78.4	1.7	12.67	16.64	24
	Female	69	410	10.9	1170	137	82	163	3.7	26.79	21.87	29
	Male	71	281	6.39	2180	663	98		1.94	21.31	20.65	31
	Female	74	165	3.5	1250	380	170	35.9	2.52	4	10.61	17

## Sheet: Female
No.	Sex	Age	RF	CRP	IgG	IgA	IgM	IgE	CEA	CA199	CA125	ESR		No.	Sex	Age	RF	CRP	IgG	IgA	IgM	IgE	CEA	CA199	CA125	ESR
2	Female	66		11.4	1460	103	25	16.9	0.83	11.5	4.96	35		1	Male	61	481	15.9	1130	413	124	302	1.29	4.85		66
3	Female	68		21.5	1080	100	72	15.3	2.54	11.67	18.23	22		10	Male	66	2330	5.91	1370	501	143	47.4	2	10.85		40
4	Female	79	506	23.4	1310	158	83	23.4	1.6	45.14	50.56	52		11	Male	66	39.3	13.5	1640	220	69	14.5				32
5	Female	60	148	8.75	1160	327	101	58.1	2.04	10.08	34.95	36		12	Male	70		5.12	1120		60	412	3.13	7.94		25
6	Female	62	271	2.1	1220	267	98	12.7	1.28	17.02	9.65	11		13	Male	76	240	12	1420	450	92		2.79	3.93		59
7	Female	56	630	3.5	1540	355	94	29.9	1.1	6.27	11.55	30		15	Male	55	28.7	10.7	1520	396	76	66.5	1.69	6.19		50
8	Female	80			1020	331	136	41.8	5.51	23.32	19.84			36	Male	65		15.3	1300	370	115	83.1	2.53	8.14		37
14	Female	49	140	4.23	1550	407	94	9.2	2.64	0.6	14.05	32		39	Male	56	262	32.8	1430	397	74	272	2.18	8.23		46
17	Female	63			1310	297	163	39.1	5.1	87.67				44	Male	65	306		1330	274	107	556	2.76	8.26		44
18	Female	46	73	14.6	1640	427	158	16.2	1.92	10.67	9.04	48		48	Male	57	28.2	5.56	1830	168	61	34.2	1.56	8.89		12
19	Female	57	137	3.6	1320	269	103	5	3.25	8.59	15.56	11			Male	36			1320	487	257	155	2.23	2.77
20	Female	64	42.1	78.2	1280	223	127	20.2	2.01	24.85	10.78	18			Male	46	349	9.25	1690	333	110	73.9	1.52	9.79		32
21	Female	68	36.1	3.07	1570	368	52	143	6.74	16.62	43.48	60			Male	50	651	2.57	1080	222	97	10.6	1.67	9.31		24
23	Female	70	469	9.56	1580	170	103	63.4	1.37	13.71	25.31	50			Male	60	1540	44	2110	440	197	193	1.38	12.13		66
24	Female	64		3.21	986	327	35	62.5	1.52	23.95	13.08	23			Male	71	281	6.39	2180	663	98		1.94	21.31	20.65	31
26	Female	66	416	17.4	814	131	110	56.8	1.19	3.99	6.99	32
27	Female	63	77	1.97	1220	331	84	102				4
28	Female	49		22.5	1350	279	197		1.43	4.9	11.44	26			p		0.107714	0.715495	0.383655	0.0276183	0.922048	0.00665063	0.637292	0.135533		0.822828
29	Female	61	55.6	1.85	1400	382	153	25.8	1.65	7.11	10.44	39			M	60	544.683	13.7692	1498	381	112	170.785	2.04786	8.75643		40.2857
30	Female	38	326	2.42	2010	648	227	229	1.19	13.1	11	76			SD	10.4266	695.394	11.9018	336.647	131.662	53.5244	169.974	0.577384	4.44883	#DIV/0!	16.0453
32	Female	62	53.3	24.7	2370	415	124	114	2.27	17.72	11.89	92			SEM	2.69213	179.549	3.07303	86.9216	33.9947	13.8199	43.8869	0.149079	1.14868	#DIV/0!	4.14285
33	Female	69	43.4	17.4	1330	236	76	142	3.21	9.67	10.12	41
35	Female	55	140	10.4								22
38	Female	63	459	12.8	1460	269	187	105	1.73	11.38	5.89	41
40	Female	68		5.63	1460	193	48	22.3	2.08	6.54	6.43	21
41	Female	60		21.6	2110	397	118	11	0.73	8.49	12.31	64
43	Female	74	908	48.2	2290	481	143	9	1.59	6.86	27.81	105
46	Female	56	336	2.45	1400	432	127	9.4	1.38	1.06	11.95	36
47	Female	77	80.9	10.6	821		29	5	2.46	19.17	11.38	21
51	Female	79		17.1	1010	166	76	13	3.85	0.99	96.4	55
52	Female	77		34	1680	358	64	148	3.62	4.65	17.97	62
53	Female	44	1130	1.62	1150	136	205	5	1.75	25.63	23.64	36
	Female	33	61.3	3.96	1080	547	205	178				29
	Female	43	259	13	1440	386	176	7.2				66
	Female	49	82.4	18.8				60	1.31	5.92	7.37	26
	Female	52	34.2	1	1940	254	65	181	0.46	4.31	8.67	105
	Female	54	86.2	4.2				505	1.48	19.14	21.73	38
	Female	56	1250	4.07				51	2.88	41.99	15.32	12
	Female	57	1170	4.6	1680	222	149	139	1.21	8.83	13.83	34
	Female	59	147	2.06	1480	157	92	6.4	1.97	7.24	13.48	33
	Female	59	221	1.79	1370	243	109	75.4	0.64	5.96	14.04	11
	Female	60	170	3.01	1040	214	95	73	1.59	16.25	14.51	24
	Female	63	383	17.2	1970	423	162	98.8	2.51	14.34	10.51	18
	Female	63	133		629	152	59	62.4	3.99	22.05	27.04	76
	Female	64	198	8.1	1310	171	105	78.4	1.7	12.67	16.64	24
	Female	69	410	10.9	1170	137	82	163	3.7	26.79	21.87	29
	Female	74	165	3.5	1250	380	170	35.9	2.52	4	10.61	17
	M	61.0213	303.986	12.1807	1401.4	292.119	113.512	72.6333	2.22186	14.9398	17.9124	38.7333
	SD	10.6127	327.277	14.2049	376.427	125.773	50.5137	87.6613	1.32652	14.9767	15.6537	24.1401
	SEM	1.54802	47.738	2.07199	54.9072	18.3458	7.36814	12.7866	0.193492	2.18456	2.28332	3.52118

## Sheet: Male
No.	Sex	Age	RF	CRP	IgG	IgA	IgM	IgE	CEA	CA199	CA125	ESR
1	Male	61	481	15.9	1130	413	124	302	1.29	4.85		66
10	Male	66	2330	5.91	1370	501	143	47.4	2	10.85		40
11	Male	66	39.3	13.5	1640	220	69	14.5				32
12	Male	70		5.12	1120	122	60	412	3.13	7.94		25
13	Male	76	240	12	1420	450	92		2.79	3.93		59
15	Male	55	28.7	10.7	1520	396	76	66.5	1.69	6.19		50
36	Male	65		15.3	1300	370	115	83.1	2.53	8.14		37
39	Male	56	262	32.8	1430	397	74	272	2.18	8.23		46
44	Male	65	306		1330	274	107	556	2.76	8.26		44
48	Male	57	28.2	5.56	1830	168	61	34.2	1.56	8.89		12
	Male	36			1320	487	257	155	2.23	2.77
	Male	46	349	9.25	1690	333	110	73.9	1.52	9.79		32
	Male	50	651	2.57	1080	222	97	10.6	1.67	9.31		24
	Male	60	1540	44	2110	440	197	193	1.38	12.13		66
	Male	71	281	6.39	2180	663	98		1.94	21.31	20.65	31
